# Supplementary material for: Carbon nanospike coated nanoelectrodes for measurements of neurotransmitters
Source: Royal Society of Chemistry journal article supplement (doi:10.1039/d1fd00053e), 2021-12-10
Supplement: d1fd00053e1.pdf [file d1fd00053e1.pdf]

Supplementary information for

Carbon nanospike coated nanoelectrodes for measurements of neurotransmitters

Qun Cao,<sup>a</sup> Zijun Shao,<sup>a</sup> Dale Hensley,<sup>b</sup> B. Jill Venton<sup>\*a</sup>

<sup>a</sup>Department of Chemistry, University of Virginia, Charlottesville, Virginia 22904, United States

<sup>b</sup>Center for Nanophase Material Science, Oak Ridge National Lab, Oak Ridge, Tennessee 37831, United States

\*Corresponding author

email: [jventon@virginia.edu](mailto:jventon@virginia.edu)

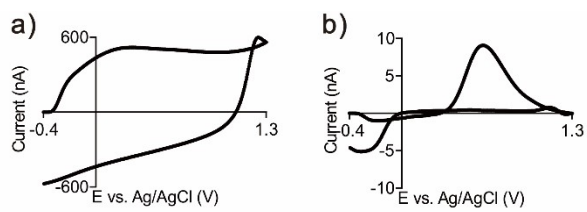

Figure S1. FSCV detection of dopamine of W/CNS nanoelectrodes. (a) Background current. (b) Background-subtracted current of 1  $\mu$ M dopamine.
